# Supplementary material for: PEDF Protects Endothelial Barrier Integrity during Acute Myocardial Infarction via 67LR
Source: MDPI journal article supplement (doi:10.3390/ijms24032787), 2023-02-01

Figure1D-ZO-1

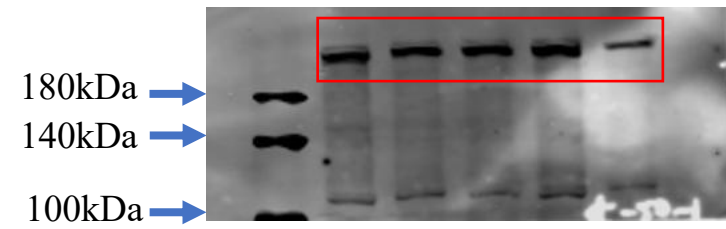

Figure1D- $\beta$ -Tubulin

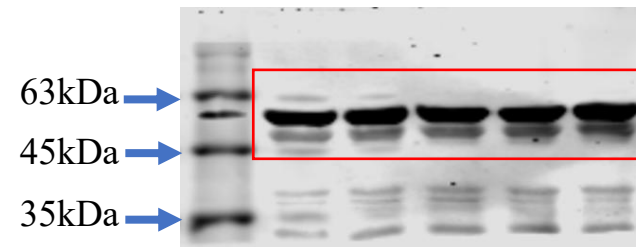

Figure2A-ZO-1

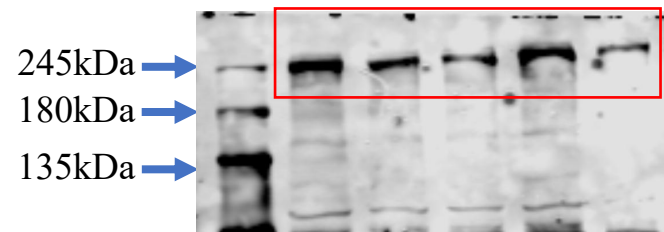

Figure2D-ZO-1

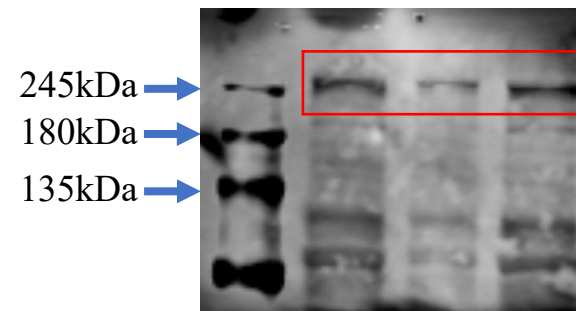

Figure2A- $\beta$ -Tubulin

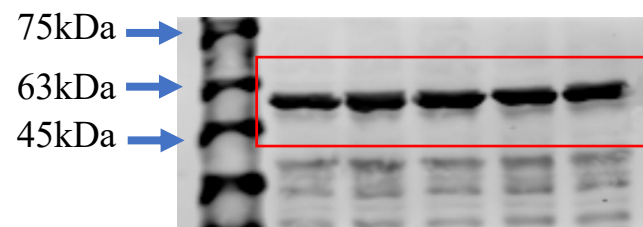

Figure2D- $\beta$ -Tubulin

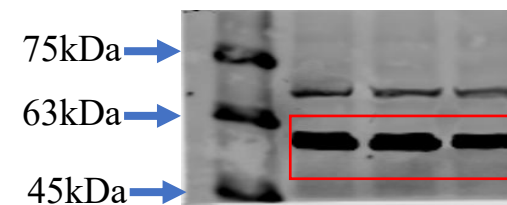

Figure3A-PI3K

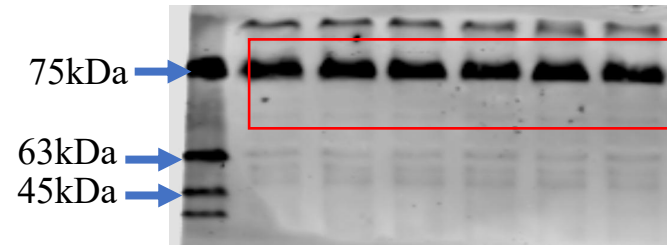

Figure3A-P-PI3K

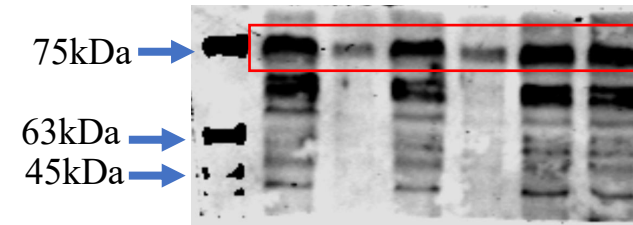

Figure3A-AKT

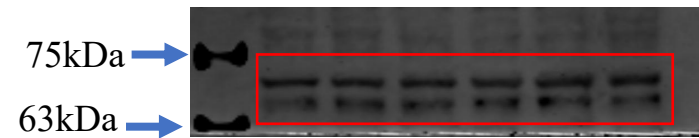

Figure3A-P-AKT

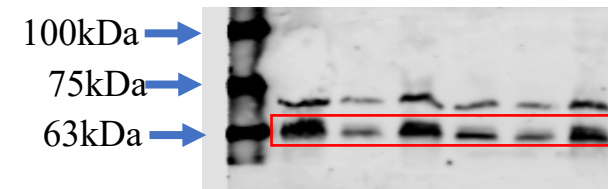

Figure3A-mTor

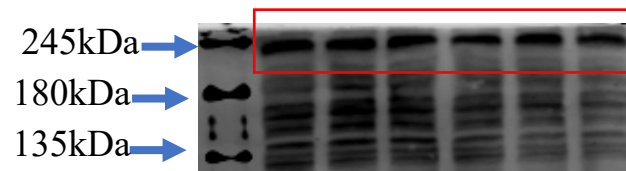

Figure3A-P-mTor

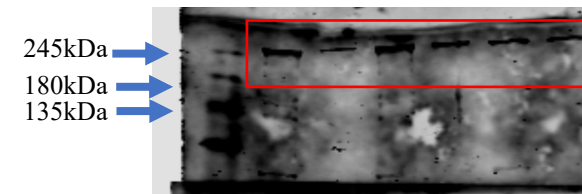

Figure3A-ZO-1

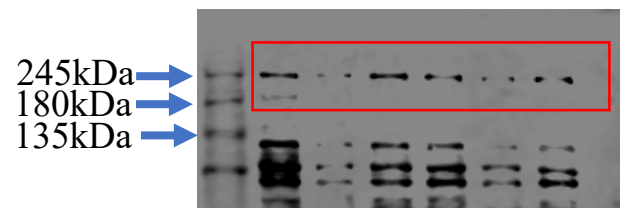

Figure3A- $\beta$ -Tubulin

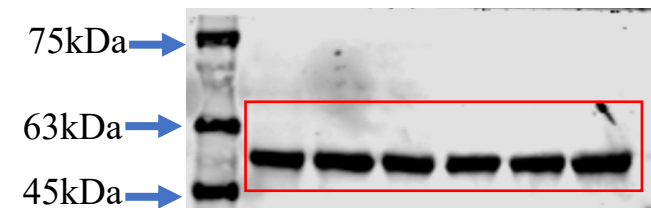

Figure4A-PEDFR

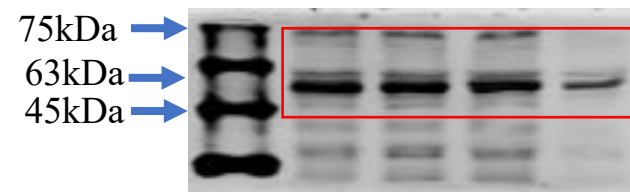

Figure4A-67LR

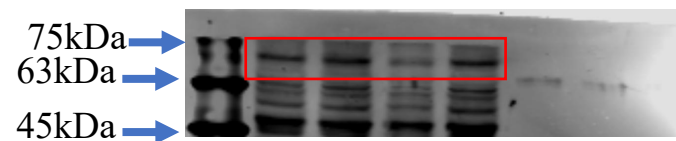

Figure4A- $\beta$ -Tubulin

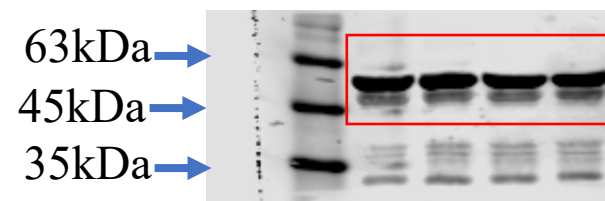

Figure4D-ZO-1

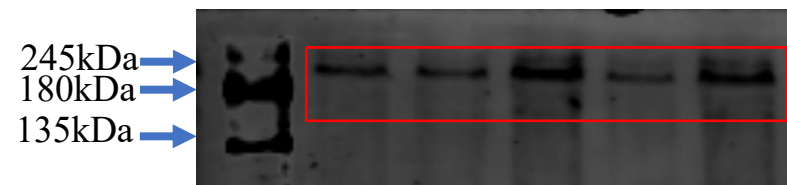

Figure4D- $\beta$ -Tubulin

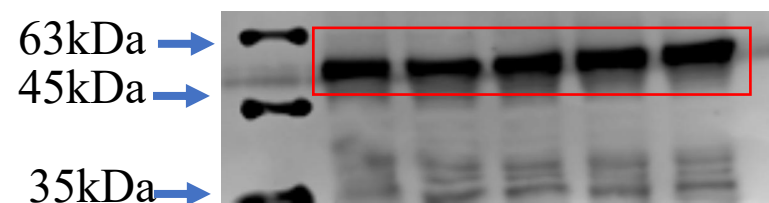

Figure5A-PI3K

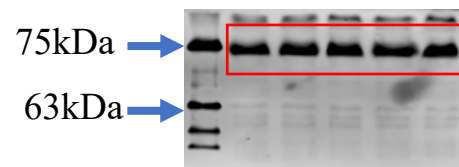

Figure5A-P-PI3K

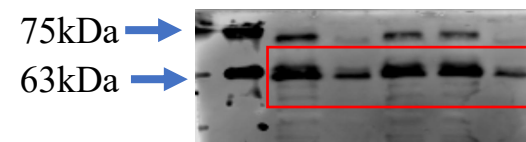

Figure5A-AKT

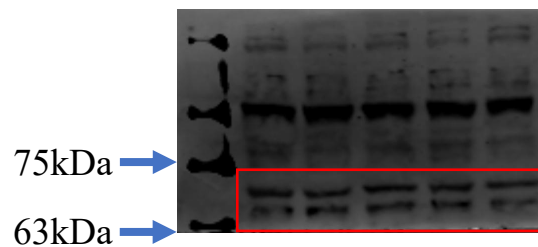

Figure5A-P-AKT

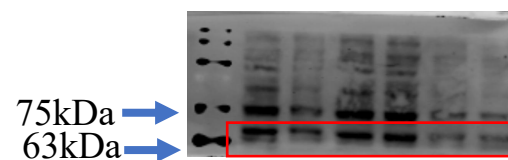

Figure5A-mTor

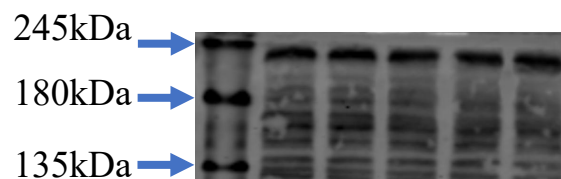

Figure5A-P-mTor

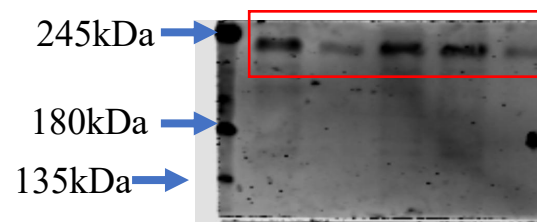

Figure5A-ZO-1

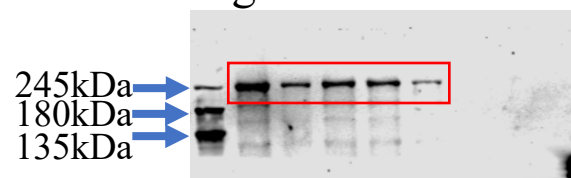

Figure5A- $\beta$ -Tubulin

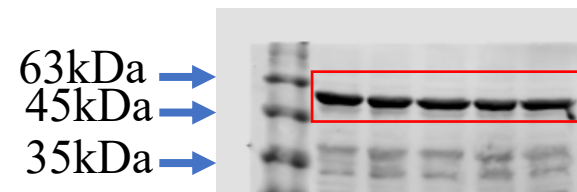

FigureS1-PEDF

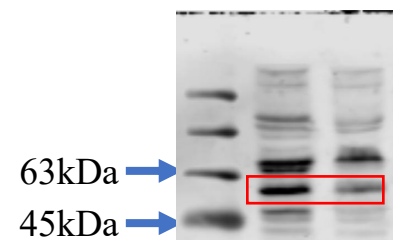

FigureS2-PEDF

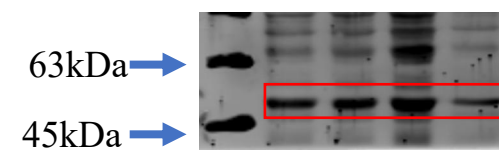

FigureS1- $\beta$ -Tubulin

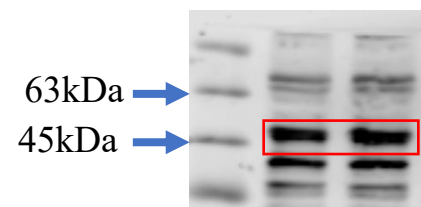

FigureS2- $\beta$ -Tubulin

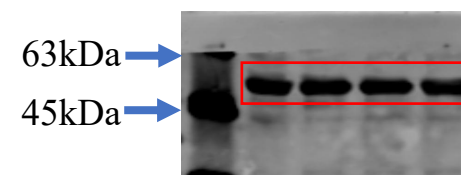

Supplement: s1 [file s1]
